# Supplementary figures and images for: Comparison of Metal-Based PZT and PMN–PT Energy Harvesters Fabricated by Aerosol Deposition Method
Source: MDPI journal article supplement (doi:10.3390/s21144747), 2021-07-12

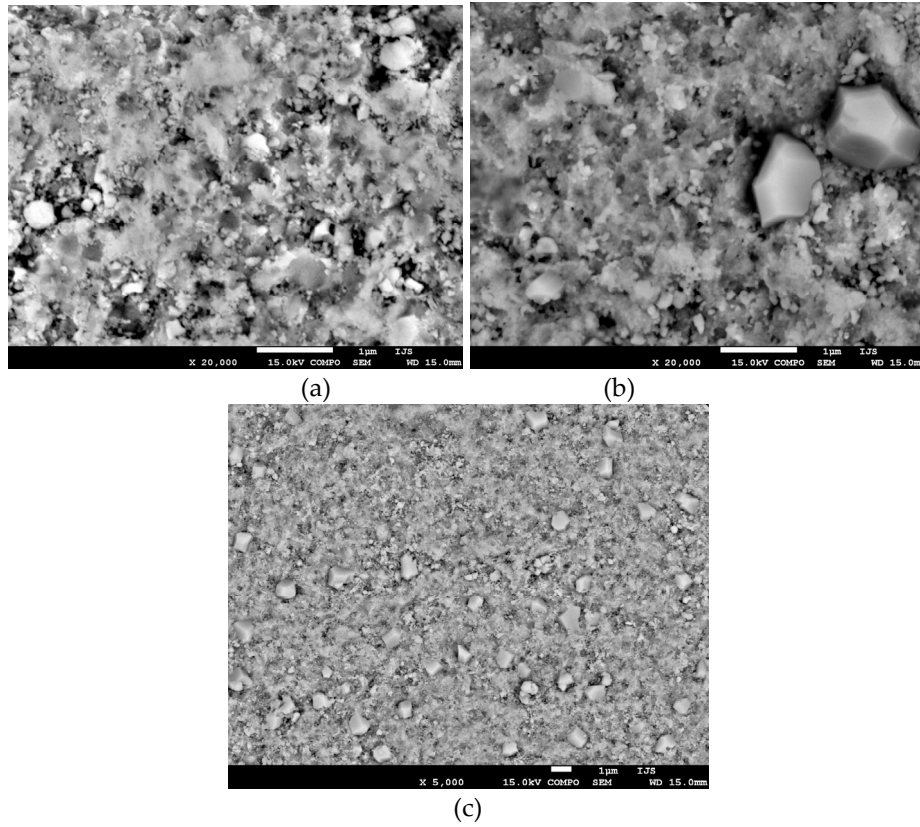

**Figure S1.** SEM images of the (a) 550 °C-annealed and (b) 600 °C-annealed, and (c) 650 °C-annealed PZT films.

Supplement: s1 [file s1]
